# Supplementary material for: Single-domain antibodies against SARS-CoV-2 RBD from a two-stage phage screening of universal and focused synthetic libraries
Source: Springer Nature journal article supplement (doi:10.1186/s12879-024-09022-8), 2024-02-13
Supplement: MOESM2 [file 26729724]

## Supplementary Information

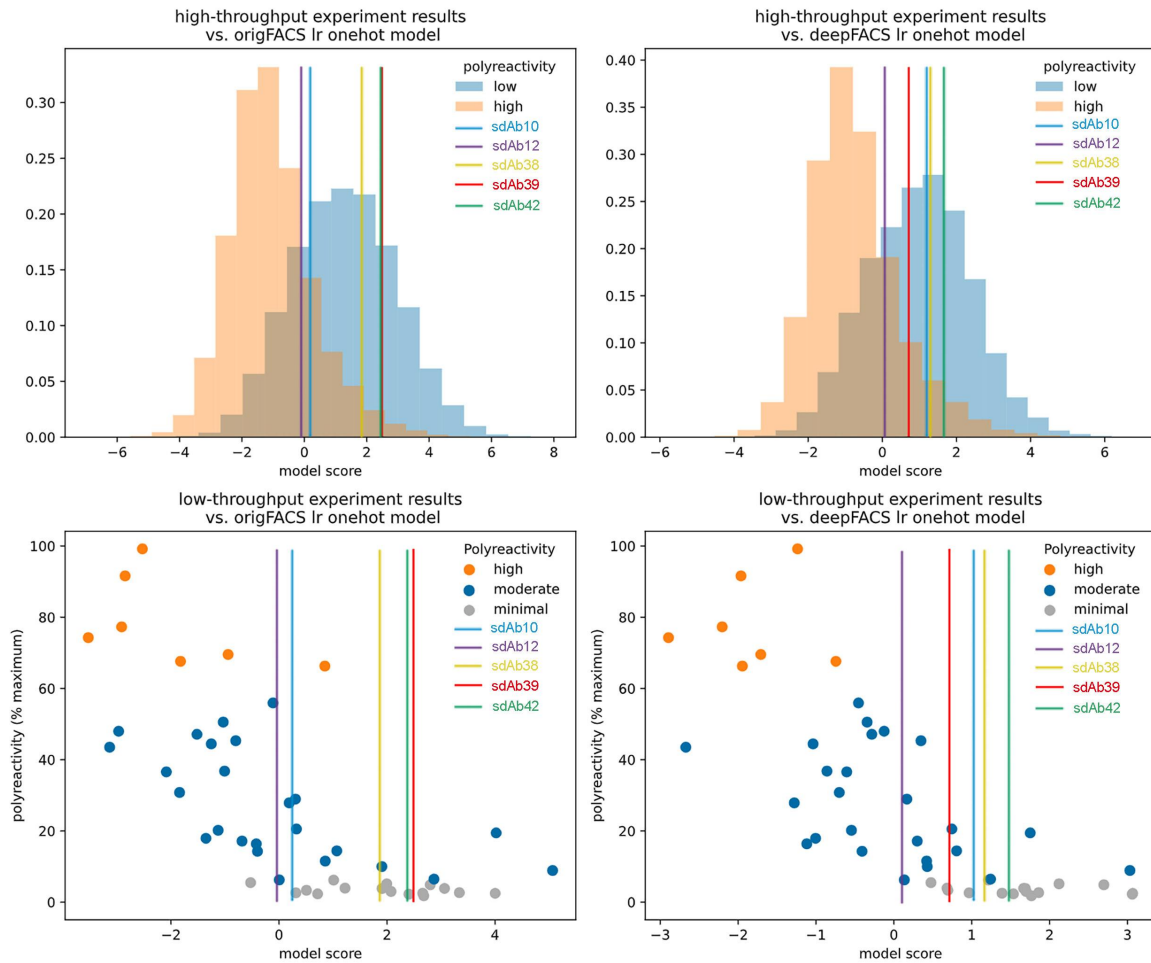

**Figure S1. The predicted polyreactivity of the SARS-CoV-2 RBD sdAbs.** A high score indicates low predicted polyreactivity, whereas a low score indicates increased polyreactivity.

**Table S1. The model scores of the SARS-CoV-2 RBD sdAbs**

| ID     | CDR1    | CDR2        | CDR3                       | Model score              |                          |
|--------|---------|-------------|----------------------------|--------------------------|--------------------------|
|        |         |             |                            | origFACS lr onehot model | deepFACS lr onehot model |
| sdAb10 | NTFPART | LVASIGPGRST | VAYTSG LALRGSFSY           | 0.24                     | 1.03                     |
| sdAb12 | NTFPART | LVASIGRGEIT | APAHGSWMSRRPHIY            | -0.13                    | 0.06                     |
| sdAb38 | NTSTRHP | LVASIGRGEIT | VCLR S V F V N C H N F A Y | 1.89                     | 1.13                     |
| sdAb39 | NTSTRHP | LVASIGRGEIT | AFVDFLSRHNSRRPYPHGY        | 2.49                     | 0.71                     |
| sdAb42 | NTSTRHP | LVASIGRGEIT | VDAVFGGRHSH                | 2.41                     | 1.43                     |

Figure 2A

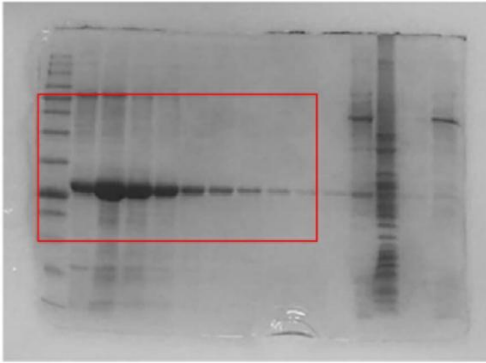

Figure 2B

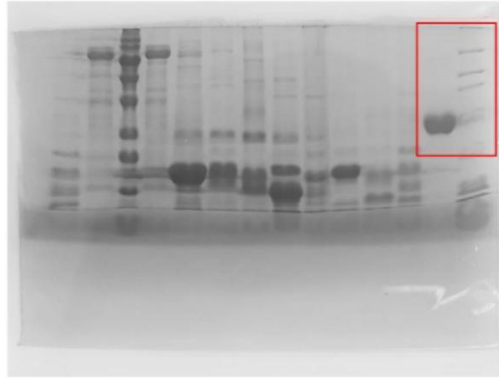

Figure 5D

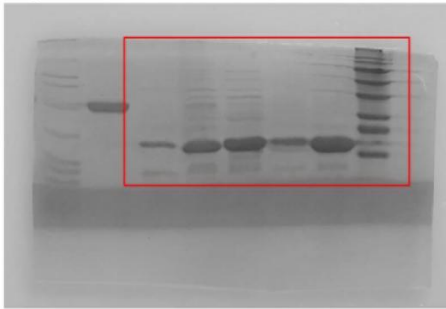

Figure 6A

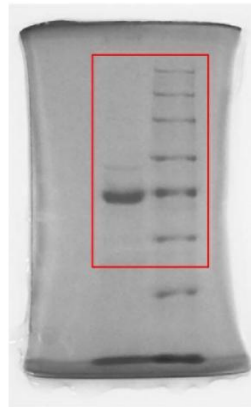

**Figure S2. Uncropped gel images of Fig 2A/B, 5D, and 6A.**
